# Supplementary material
Source: Springer Nature journal article supplement (https://www.springermedizin.de/resource/supplementary/12936_2013_3023_MOESM5_ESM.pdf/9544856)

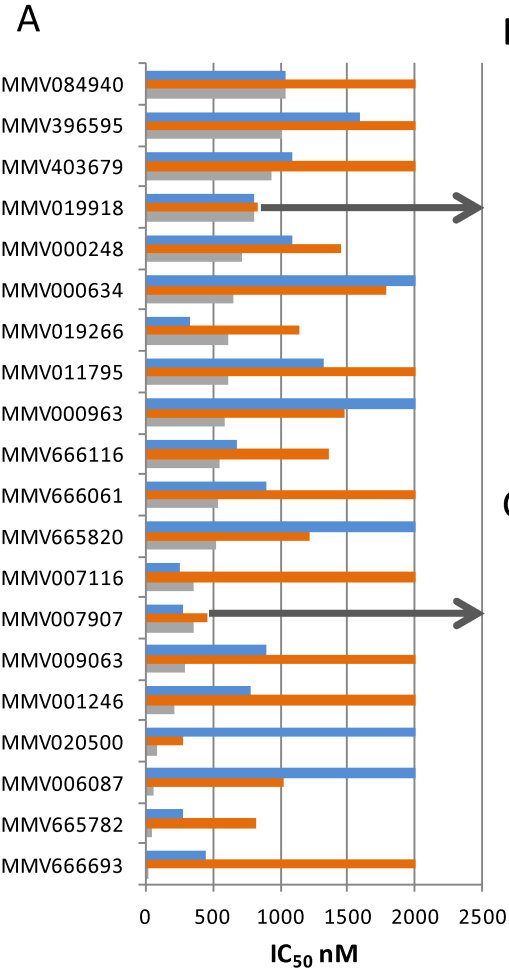

■ LATE ■ EARLY ■ 3D7

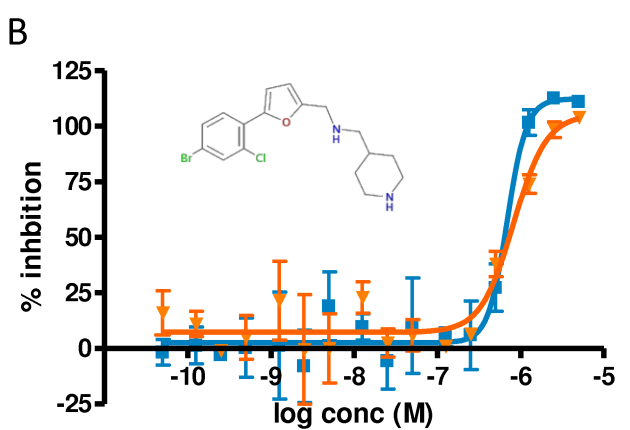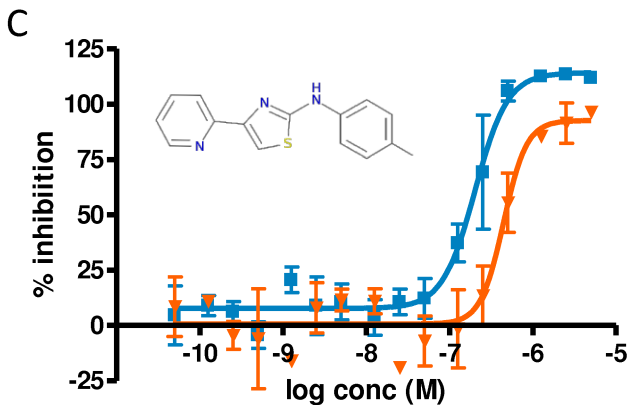

Supplement: MOESM5 [file 9544856]
